# Supplementary material
Source: PubMed Central journal article supplement (PMC2785968)
Supplement: pp.109.147462_1.pdf [file pp.109.147462_1.pdf]

## SUPPLEMENTAL MATERIAL

The following supplementary material is available for this article on line:

**Figure S1.** Comparative analysis of relative abundance (peak height) of fungal (A) and bacterial (B) phylotypes significantly differed between wild type (Col-0) and *abcg30*. Negative control (T) (soil without plant) also included in this analysis. \* indicates the values are statistically significant compared to wild type at  $P < 0.05$ .

**Figure S2.**  $^1\text{H}$  NMR (A), 2D *J*-resolved (B), and projected 1D *J*-resolved (C) spectra of control *Arabidopsis* root exudates (Col 0) in the range of  $\delta$  6.0 –  $\delta$  8.7.

**Figure S3.** Loading plot of PC1 (A) and loading plot of PC2 (B) of principal component analysis of *Arabidopsis* root exudates using projected 1D *J*-resolved spectrum.

**Figure S4.** 2D *J*-resolved spectrum of wild type root exudates with compound assignments. (A) 1, salicylic acid; 2, shikimic acid; 3, (S)-(-)-tyrosine; 4, (S)-(-)-tryptophan; 5, phenylalanine; 6, naringenin; 7, naringin; 8, catechol; 9, benzoic acid; 10, cinnamic acid; 11, caffeic acid; 12, ferulic acid; 13, syringic acid; 14, cyanidin; 15, indole-3-acetic acid; 16, flavonoid-7-glycoside; 17, sinapic acid; 18, formic acid. (B) 19, glucose ( $\alpha$ - form); 20, raffinose; 21, sinapoyl malate.

**Figure S5.** 2D *J*-resolved spectrum of wild type root exudates with compound assignments. (A) 19, glucose ( $\beta$  –form); 22, galactose; 23, tartaric acid. (B) 24, fructose; 25, mannitol.

**Figure S6.** 2D *J*-resolved spectrum of wild type root exudates with compound assignments. 26, acetic acid; 27, succinic acid; 28, malic acid; 29, L-methionine; 30, valine; 31, alanine; 32,  $\alpha$ -linolenic acid; 33, lactic acid; 34, threonine.

**Figure S7.** Comparison of one dimensional projected *J*-resolved spectra of *Arabidopsis* wild type and mutant's root exudates in the range of  $\delta$  8.6 –  $\delta$  5.7. 1: Col-0, 2: *abcg30*, 3: *abcg34*, 4: *abcg35*, 5: *abcb1*, 6: *abcb4*, 7: *abcc2*, 8: *abca7*.

**Figure S8.** Comparison of one dimensional projected *J*-resolved spectra of *Arabidopsis* wild type and mutant's root exudates in the range of  $\delta$  5.6 –  $\delta$  4.3. 1: Col-0, 2: *abcg30*, 3: *abcg34*, 4: *abcg35*, 5: *abcb1*, 6: *abcb4*, 7: *abcc2*, 8: *abca7*.

**Figure S9.** Comparison of one dimensional projected *J*-resolved spectra of *Arabidopsis* wild type and mutant's root exudates in the range of  $\delta$  4.3 –  $\delta$  3.0. 1: Col-0, 2: *abcg30*, 3: *abcg34*, 4: *abcg35*, 5: *abcb1*, 6: *abcb4*, 7: *abcc2*, 8: *abca7*.

**Figure S10.** Comparison of one dimensional projected J-resolved spectra of Arabidopsis wild type and mutant's root exudates in the range of  $\delta$  3.0 –  $\delta$  0.5. 1: Col-0, 2: *abcg30*, 3: *abcg34*, 4: *abcg35*, 5: *abcb1*, 6: *abcb4*, 7: *abcc2*, 8: *abca7*.

**Figure S11.** Percentages of genes belonging to different functional categories were significantly up-regulated and down-regulated in *abcg30* root tissues compared with wild type (Col-0) by whole genome expression analyses. The differentially expressed genes are statistically significant at a P value below 0.01 and show more than 1.5-fold induction.

**Figure S12.** Phylogenetic tree showing the evolutionary relationships of 66 taxa of the group alpha-proteobacteria based on rDNA sequences. The evolutionary history was inferred using the Neighbor-Joining method. The bootstrap consensus tree inferred from 1000 replicates is taken to represent the evolutionary history of the taxa analyzed. Branches corresponding to partitions reproduced in less than 50% bootstrap replicates are collapsed. The percentage of replicate trees in which the associated taxa clustered together in the bootstrap test (1000 replicates) is shown next to the branches. The tree is drawn to scale, with branch lengths in the same units as those of the evolutionary distances used to infer the phylogenetic tree. All positions containing alignment gaps and missing data were eliminated only in pairwise sequence comparisons (Pairwise deletion option). There were a total of 1577 positions in the final dataset. Phylogenetic analyses were conducted in MEGA4.

**Table S1.** Multi-response permutation procedures (MRPP) analysis comparing the microbial community associated with each Arabidopsis ABC transporter mutant. Each row (sample) was relativized by its total and each column (phylotype) was arcsine transformed. Generations were analyzed separately. The values in bold are statistically significant at  $P \leq 0.05$ ,  $n = 3$ .

**Table S2.** Pair wise comparisons (compared to wild type (Col-0) from MRPP analysis comparing the microbial community associated with each Arabidopsis ABC transporter mutant. Each row (samples) was relativized by its total and each column (phylotype) was arcsine transformed. Generations were analyzed separately. The values in bold are statistically significant at  $P \leq 0.05$ ,  $n = 3$ . Col, Col-0 (wildtype); *Ler*, Landsberg ecotype; T, negative control (soil without plant); *tt4*, *abca7*, *abcg30*, *abcg34*, *abcg35*, *abcc2*, *abcb1*, *abcb4*.

**Table S3.** Relative NMR intensity of changed metabolites in Col-0 and *abcg30* using projected *J*-resolved spectra (signals are normalized to 1000 of internal standard (TMSP) at  $\delta$  0.0. Values represented are the mean values of two independent experiments in triplicate (n=6).

**Table S4:** Select list of genes differentially expressed in *abcg30* roots compared with wild type. The genes represented in this list are significantly up- and down-regulated at the value of  $P < 0.01$ .

**Table S5.** *In vitro* analysis of the Arabidopsis wild type (Col-0), *abcg30* root exudates and MS liquid media (control) effect on Arabidopsis soil microbes by plate counting assay. Values represented are the mean values of three independent experimental results. The readings were taken at two time points 24 and 48 hrs after plating. The values represent in parentheses are counts observed at 48 hr.

**Table S6.** List of ABC transporters and their T-DNA KO mutants used in this study.

Figure S1

A

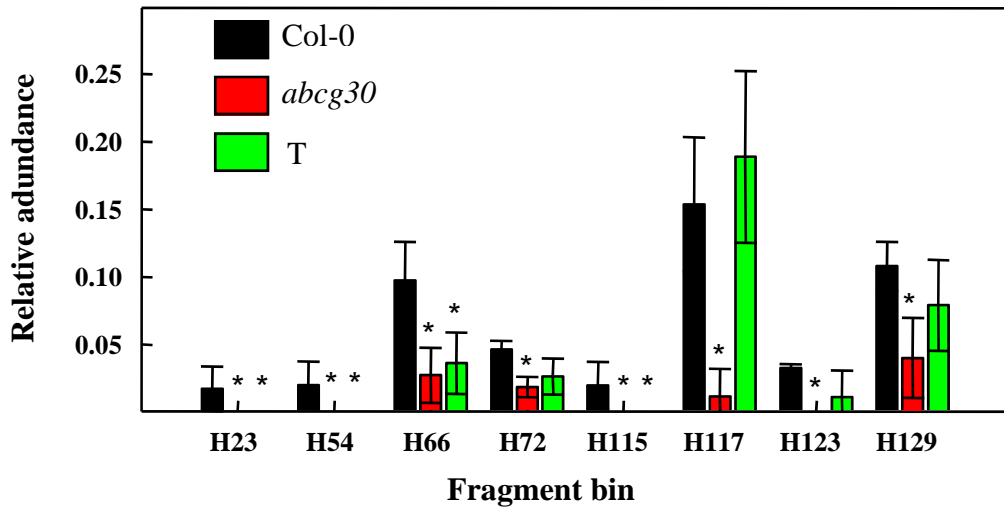

B

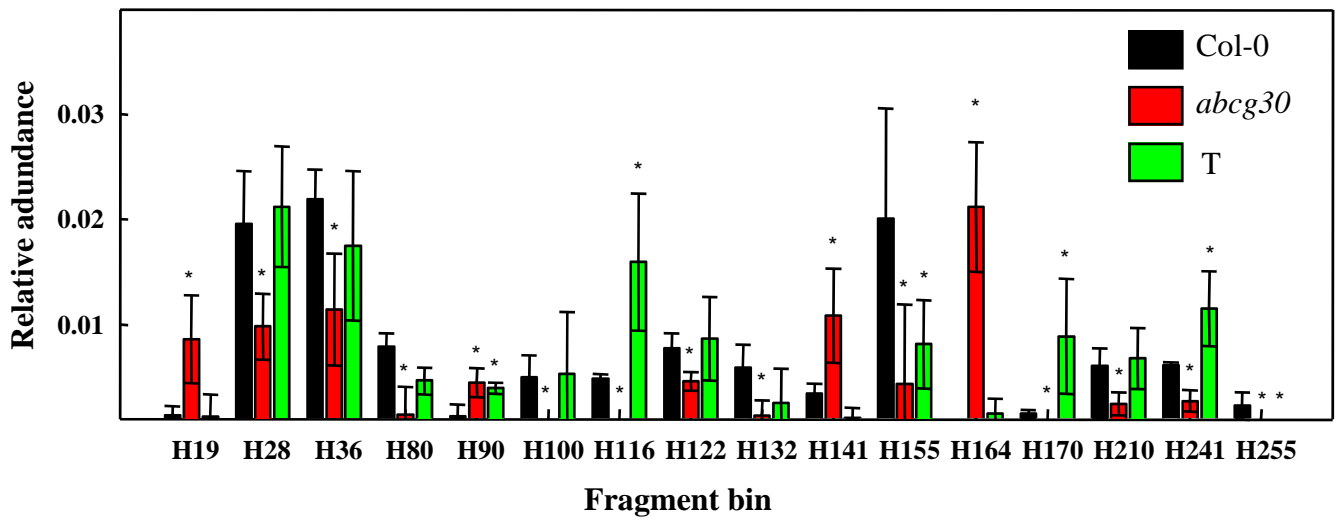

**Figure S2**

**A**

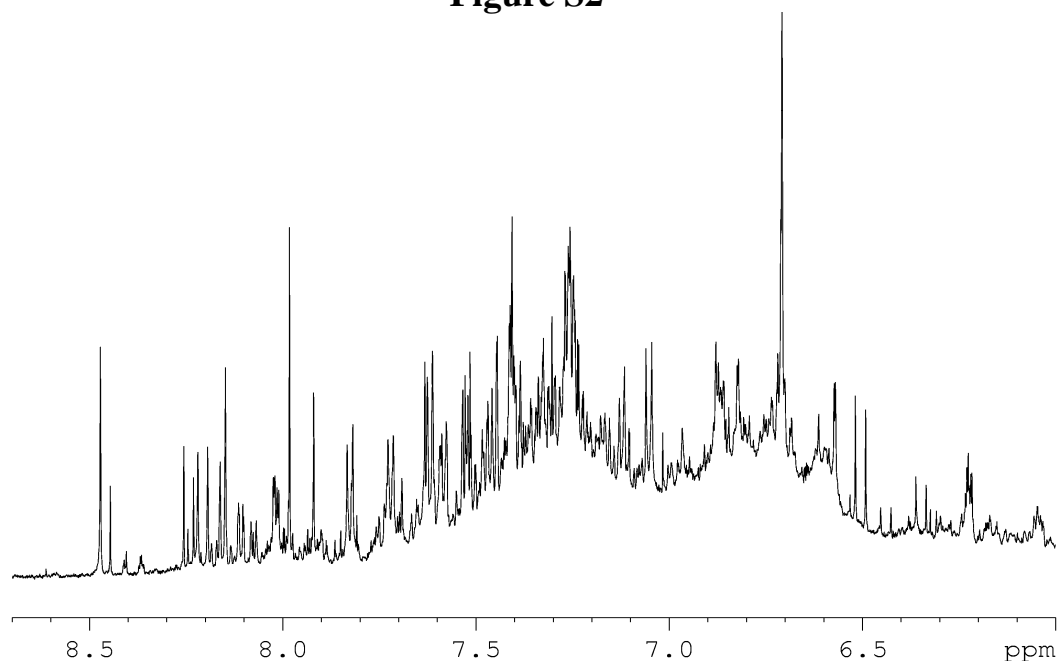

**B**

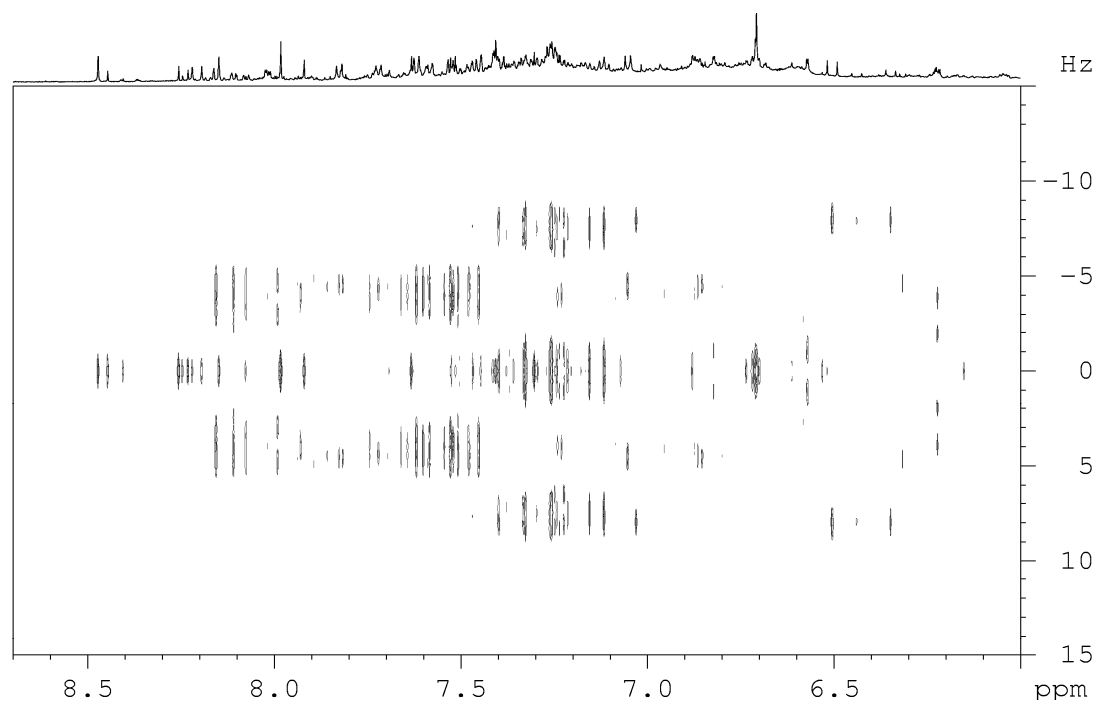

**C**

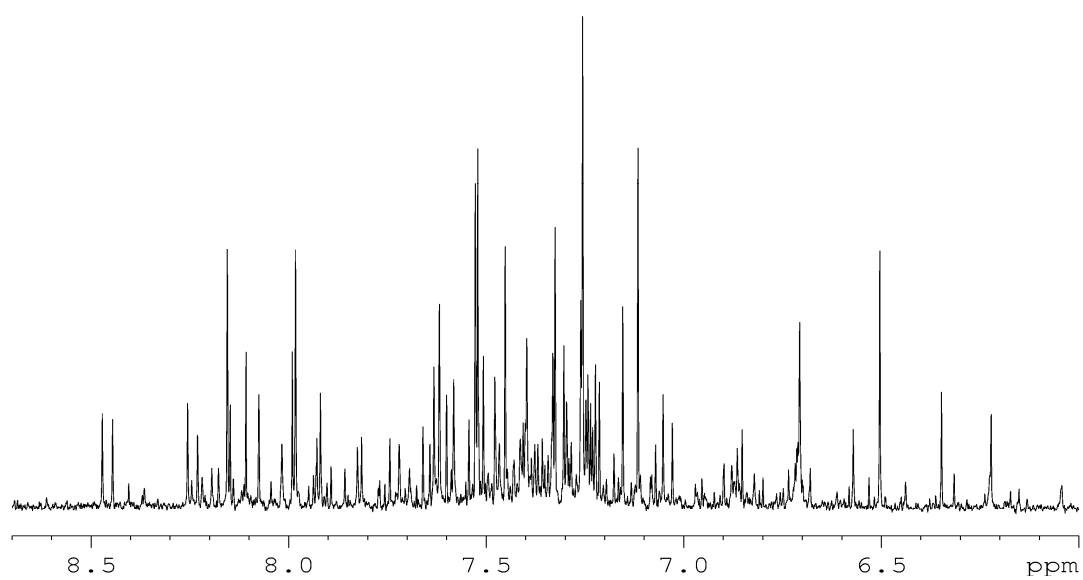

Figure S3

A

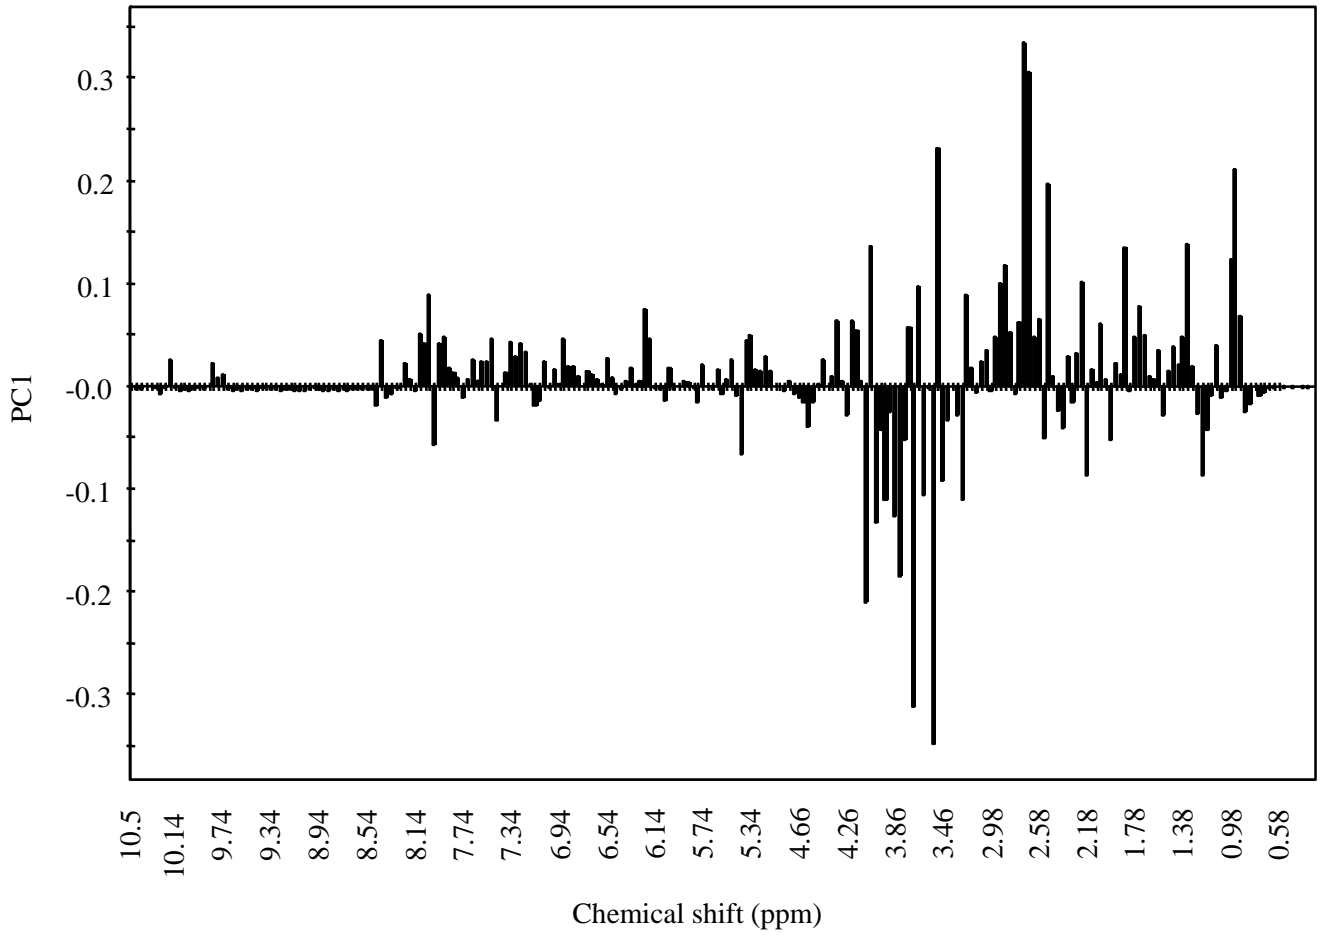

B

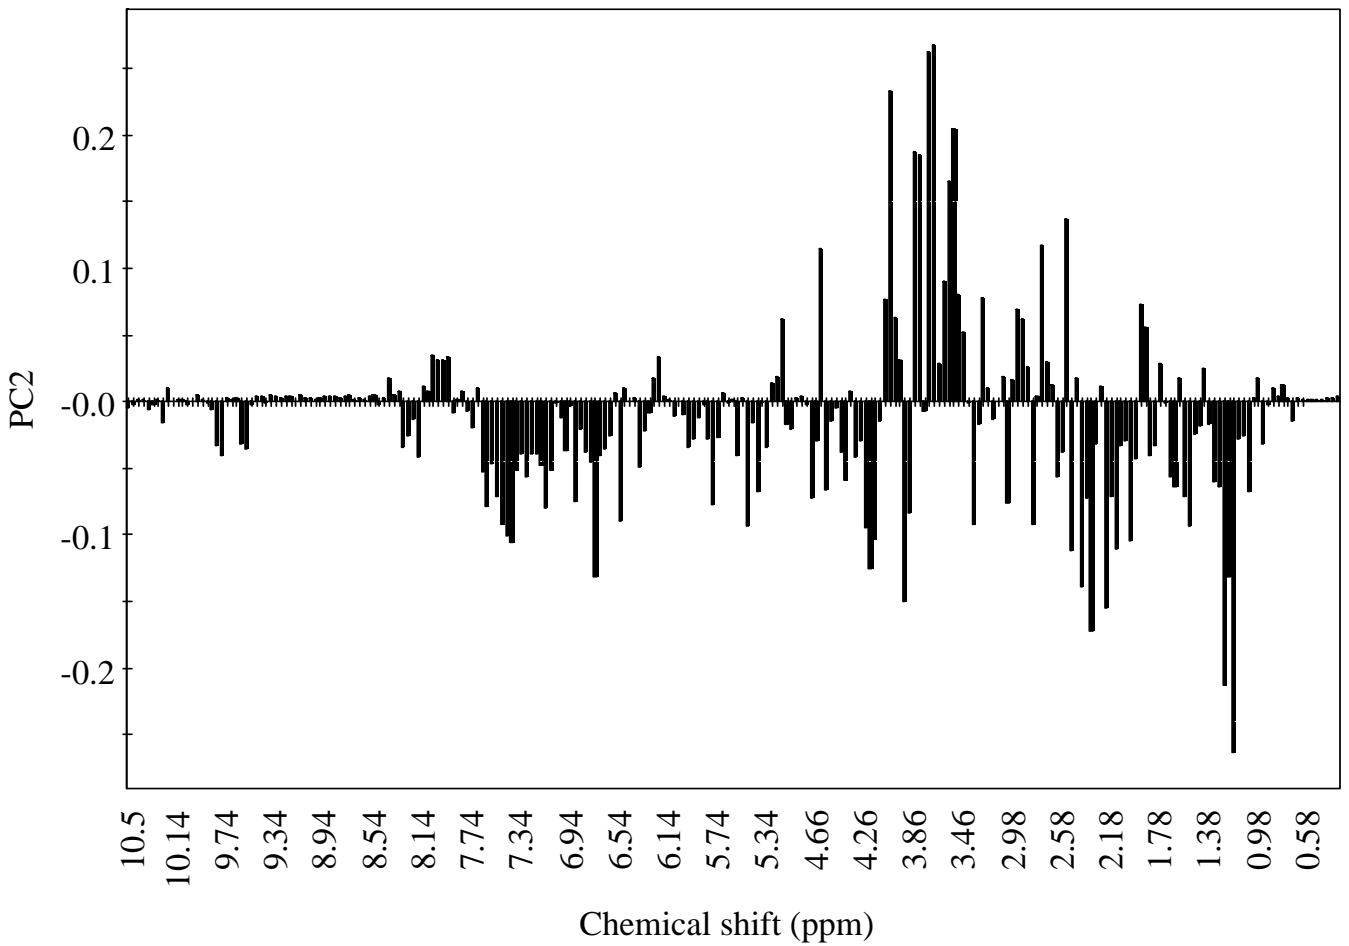

Figure S4

**A**

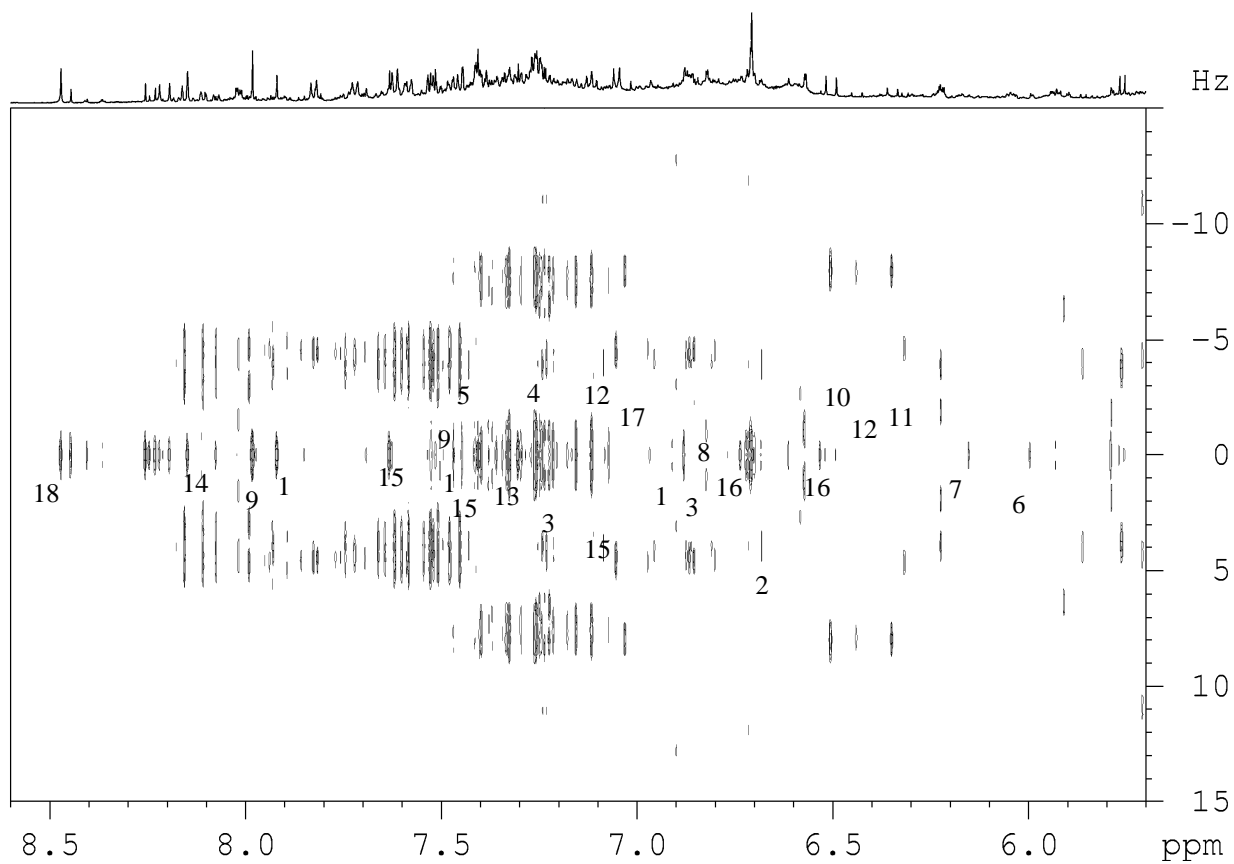

**B**

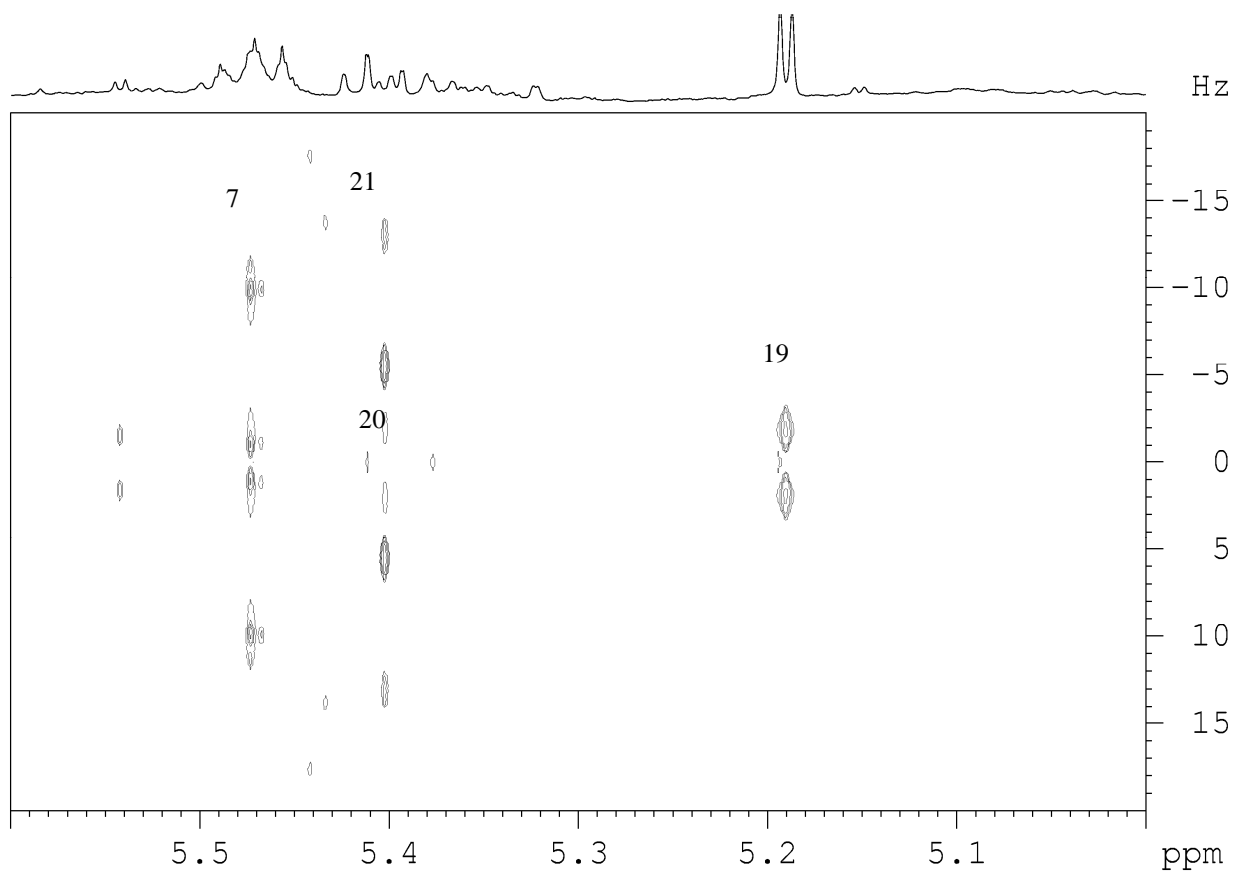

Figure S5

**A**

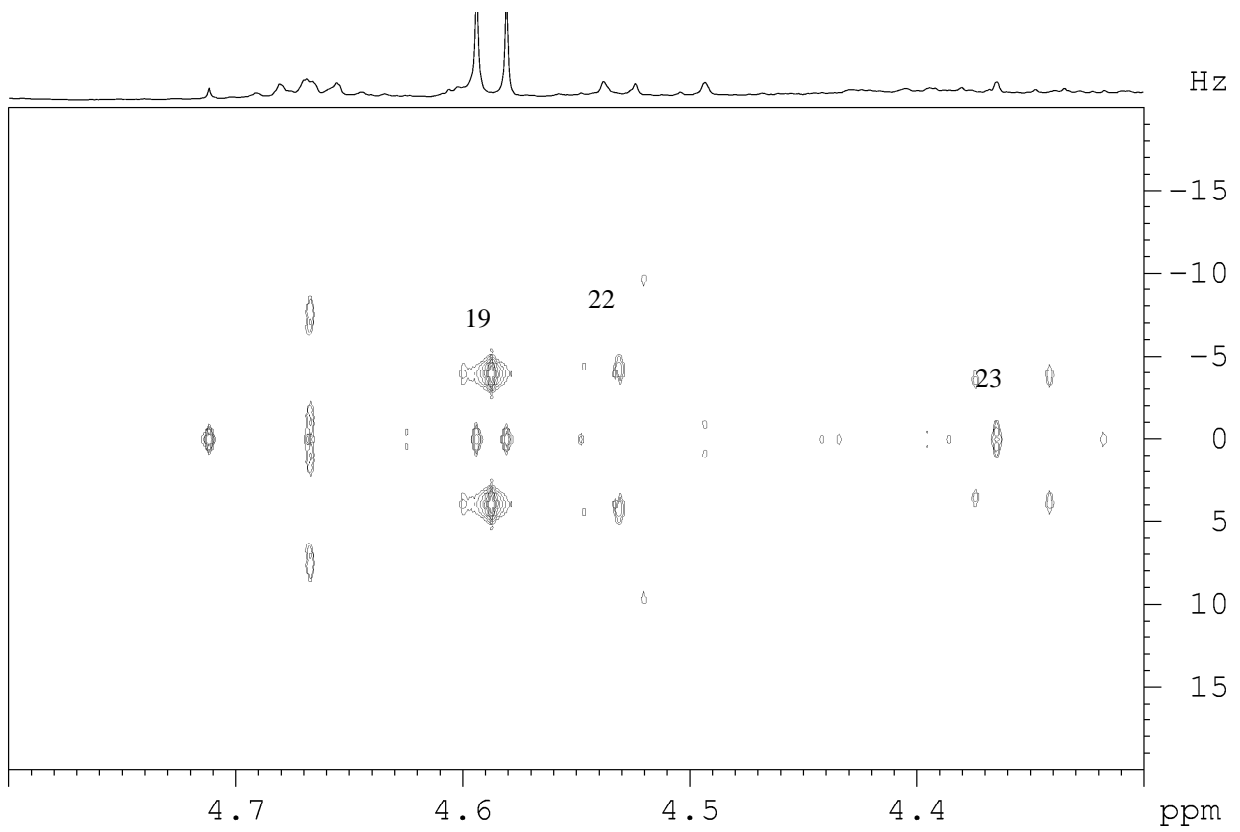

**B**

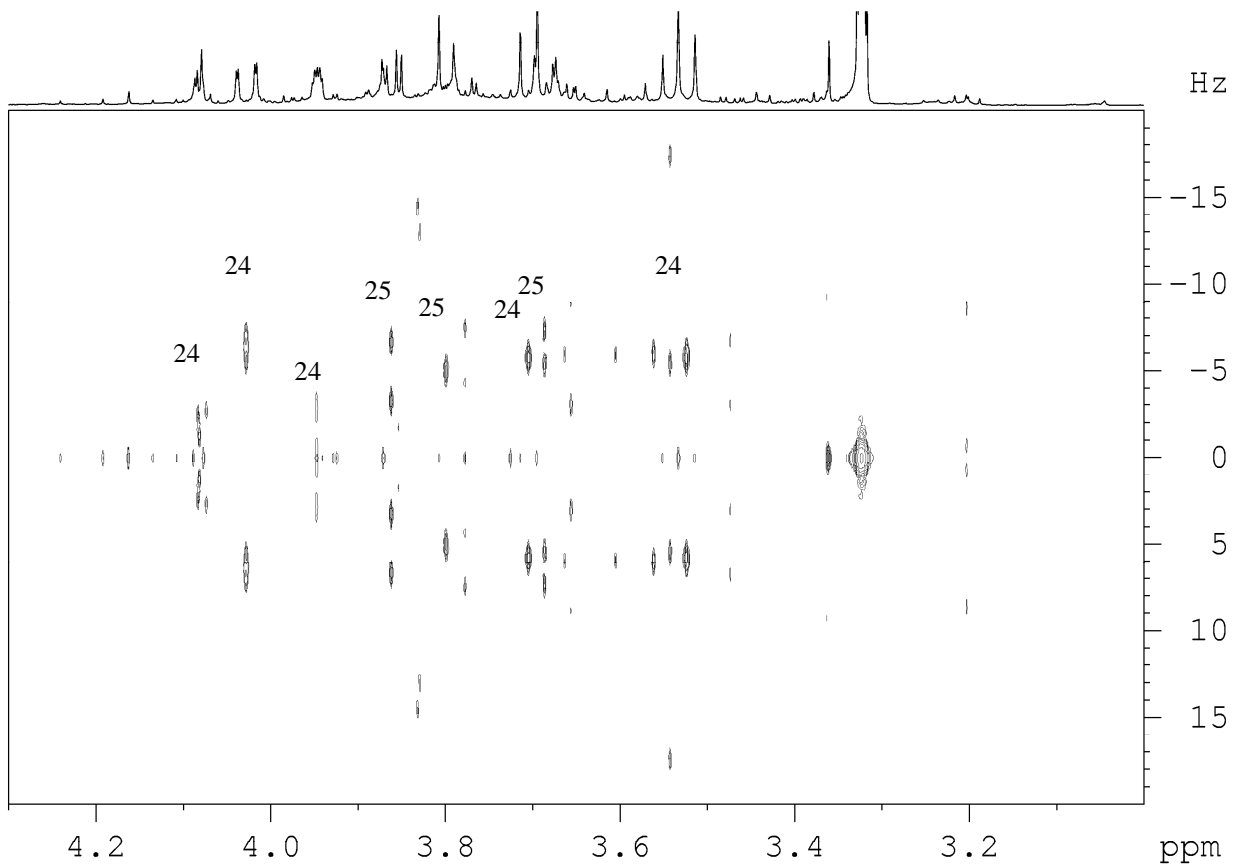



**Figure S6**

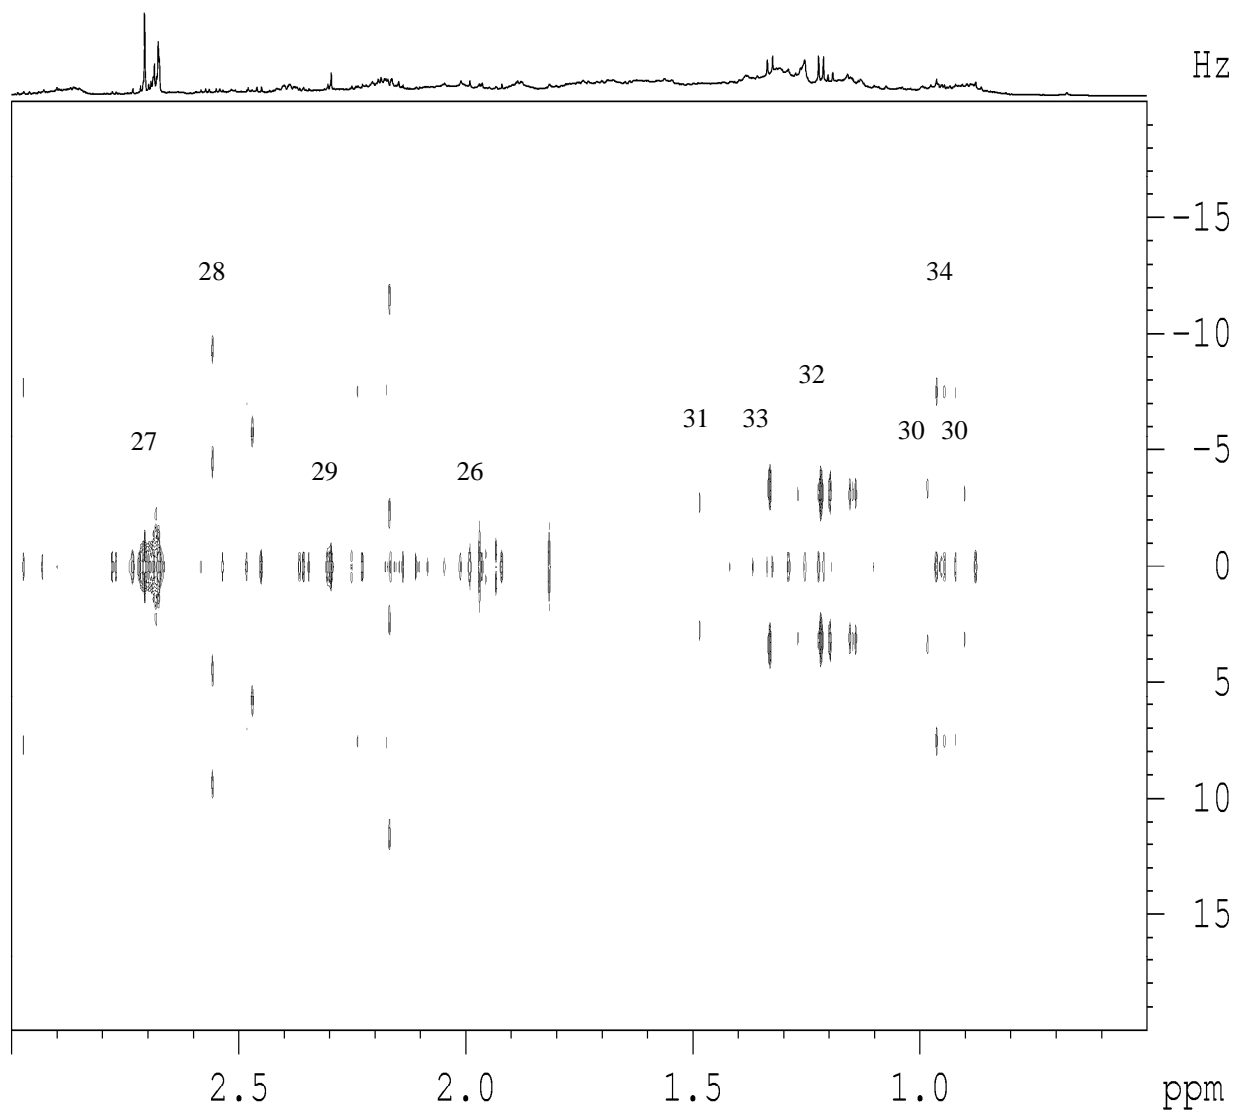

**Figure S7**

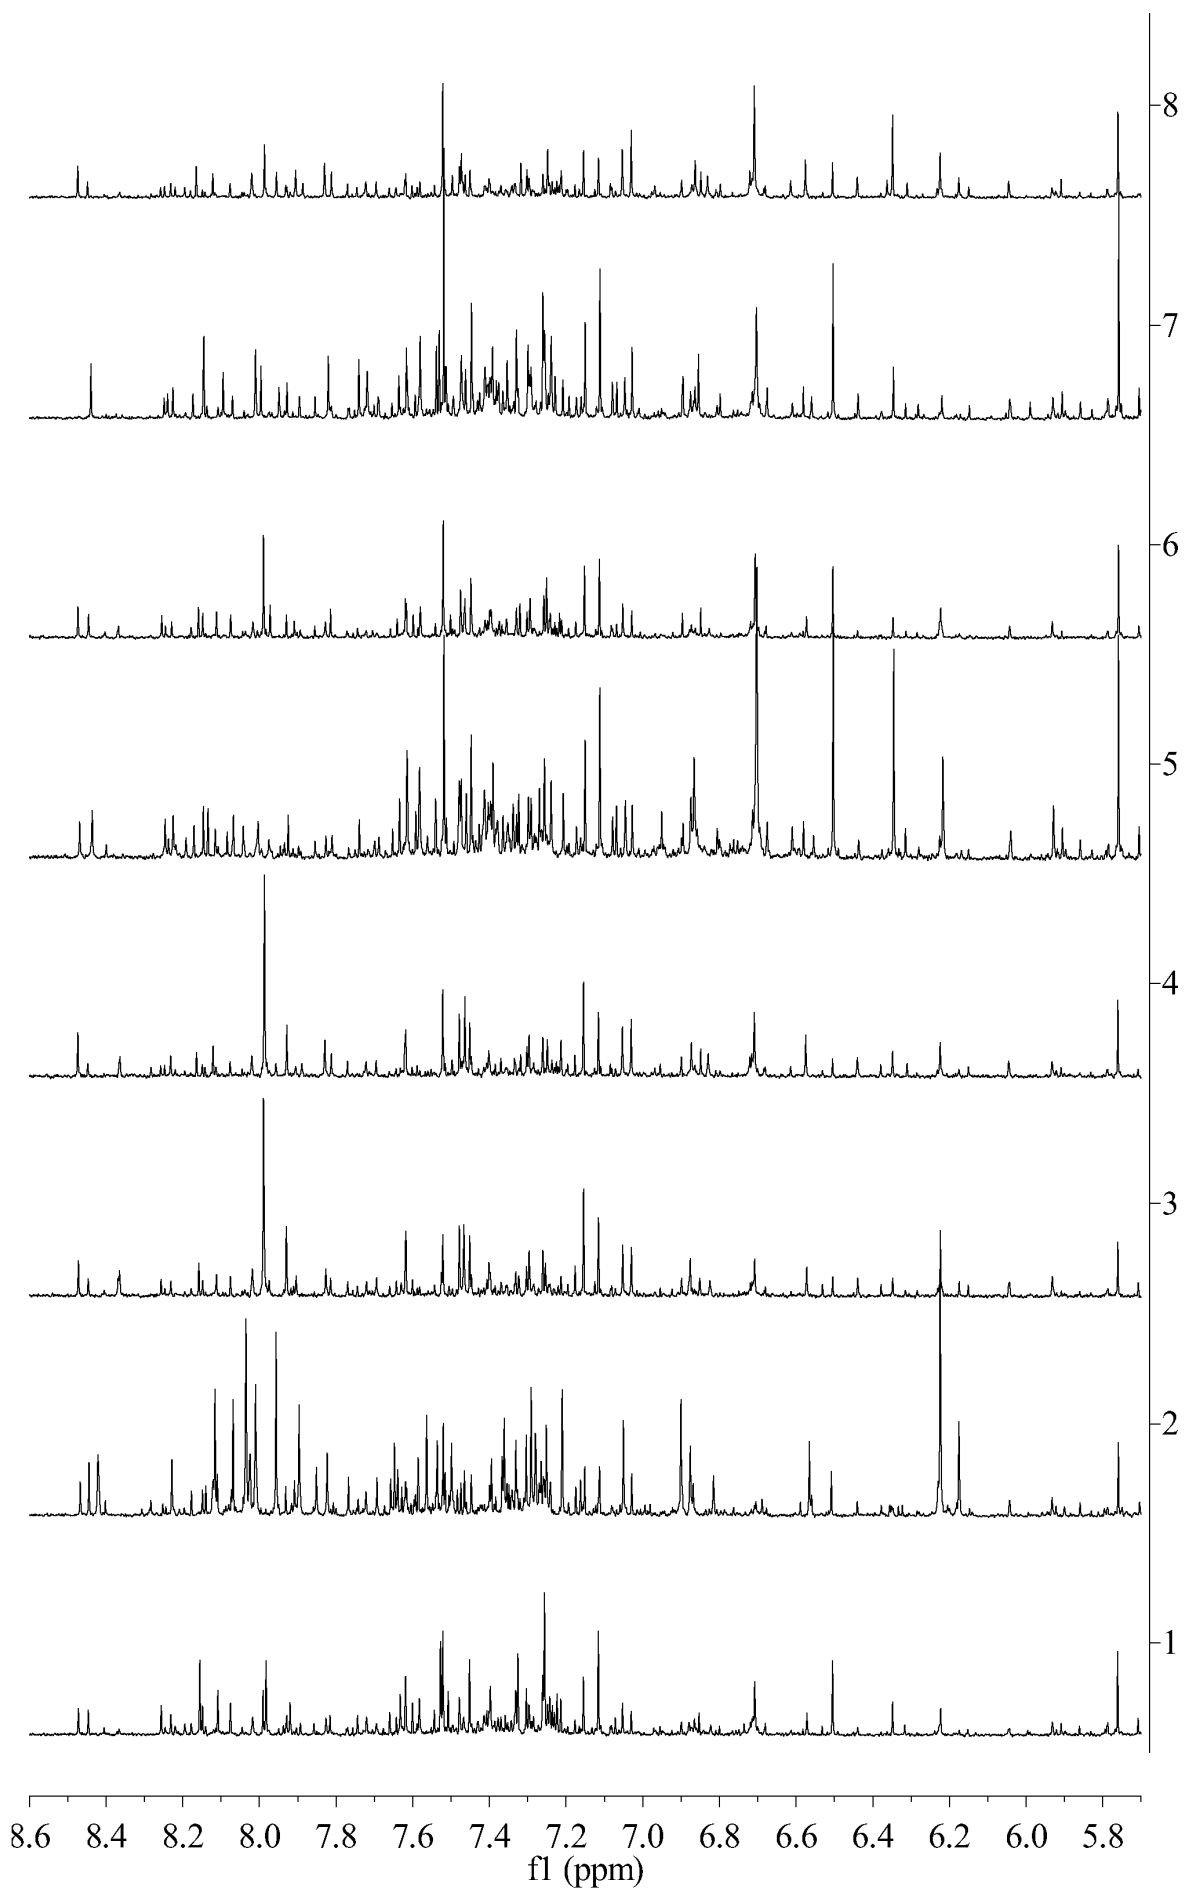

Figure S8

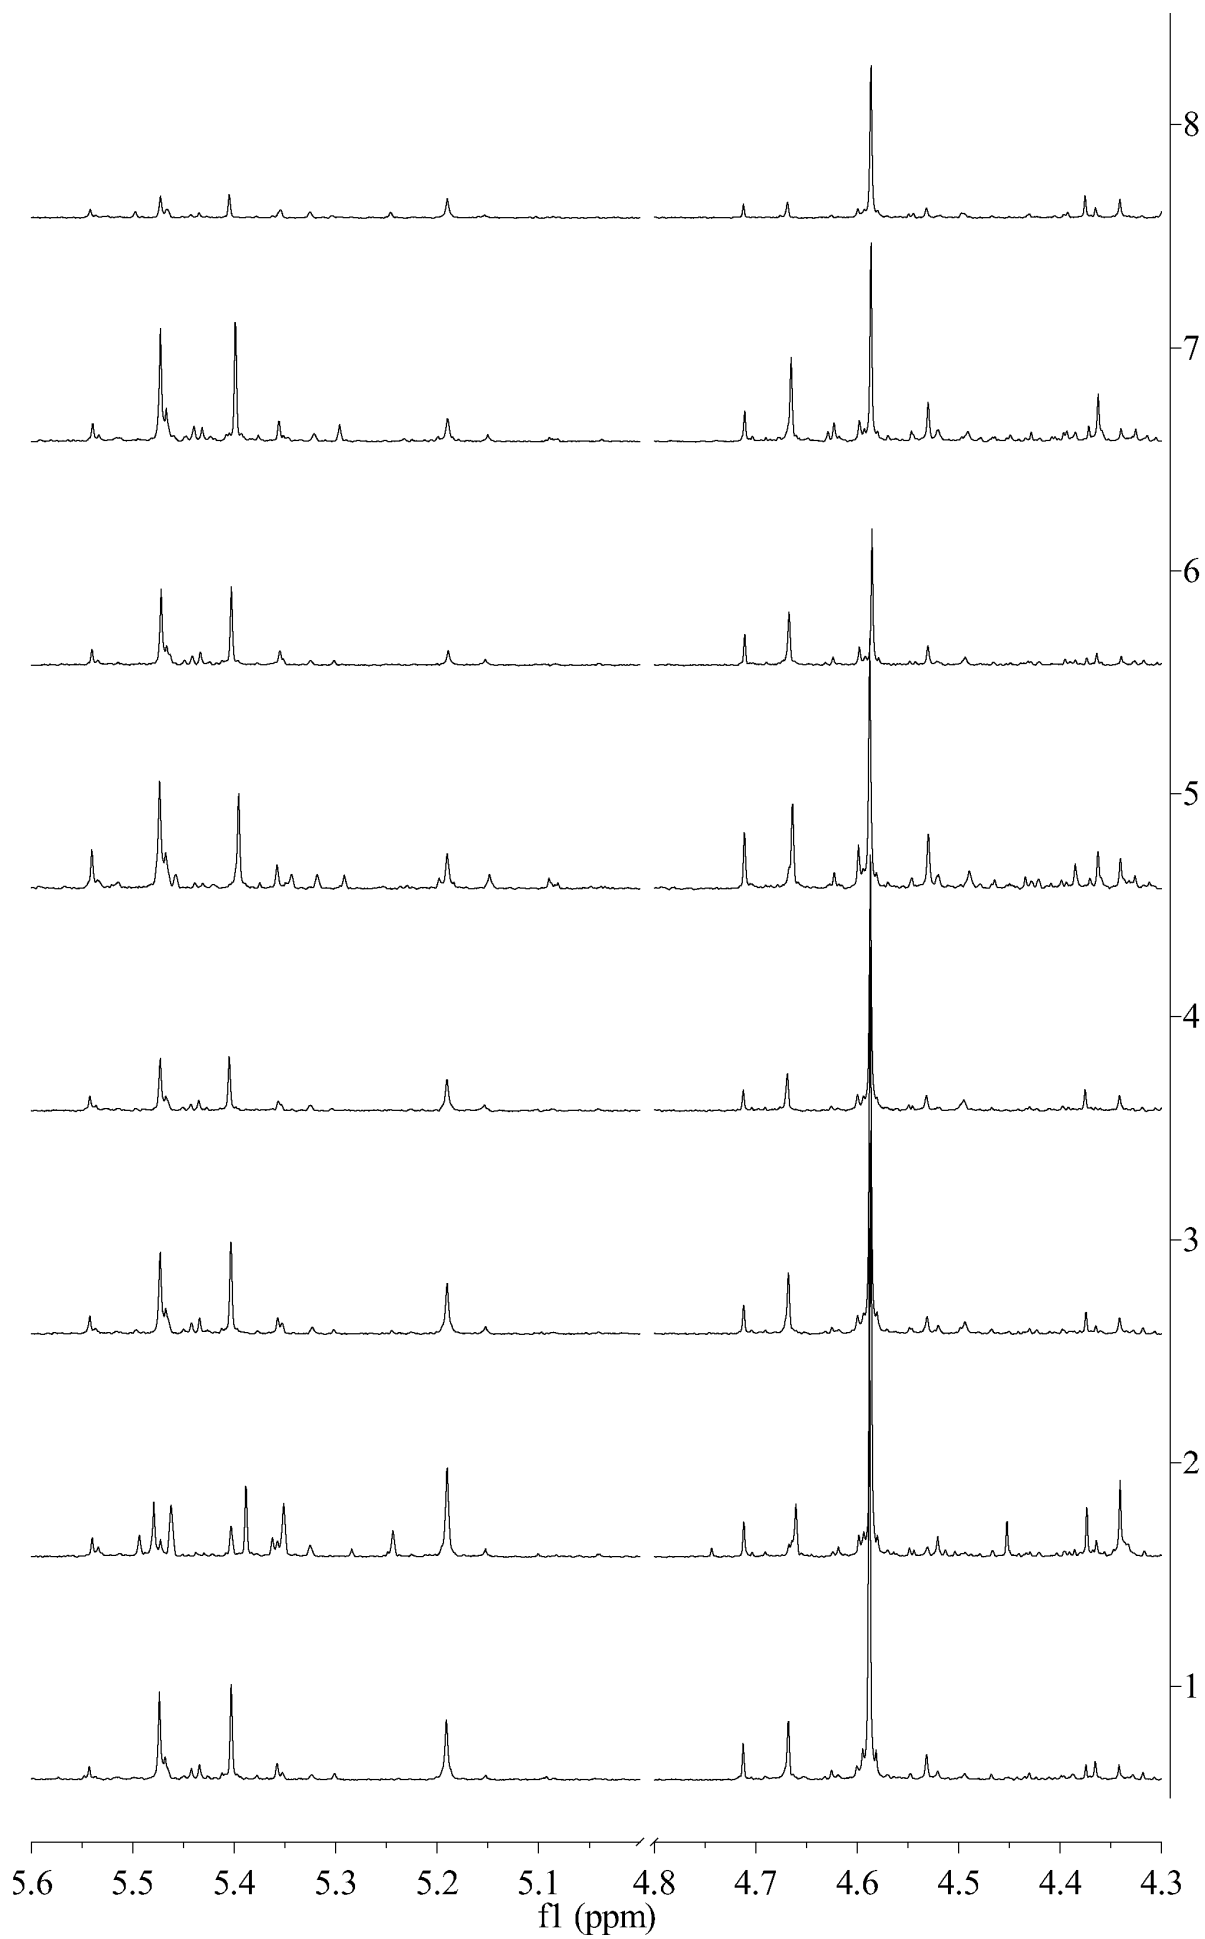

**Figure S9**

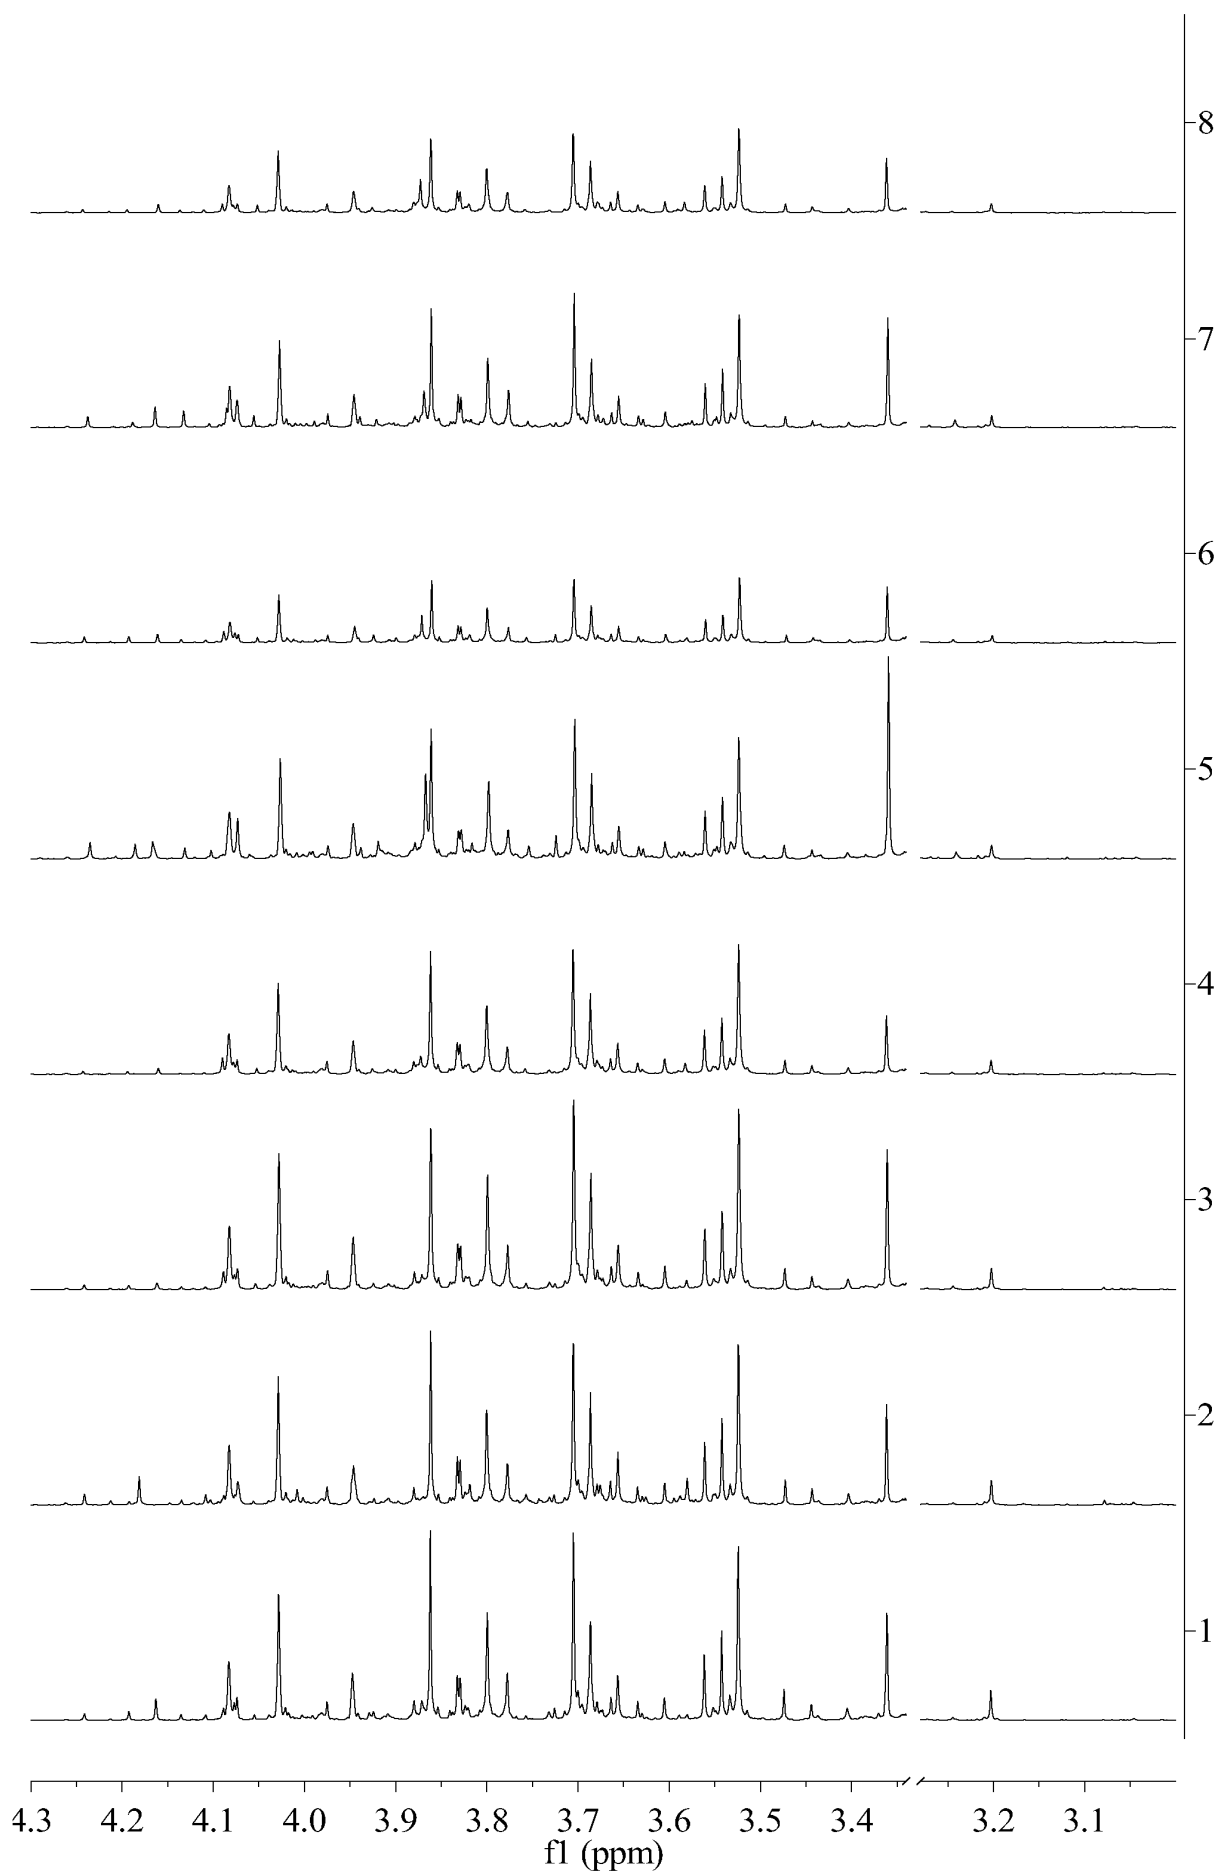

Figure S10

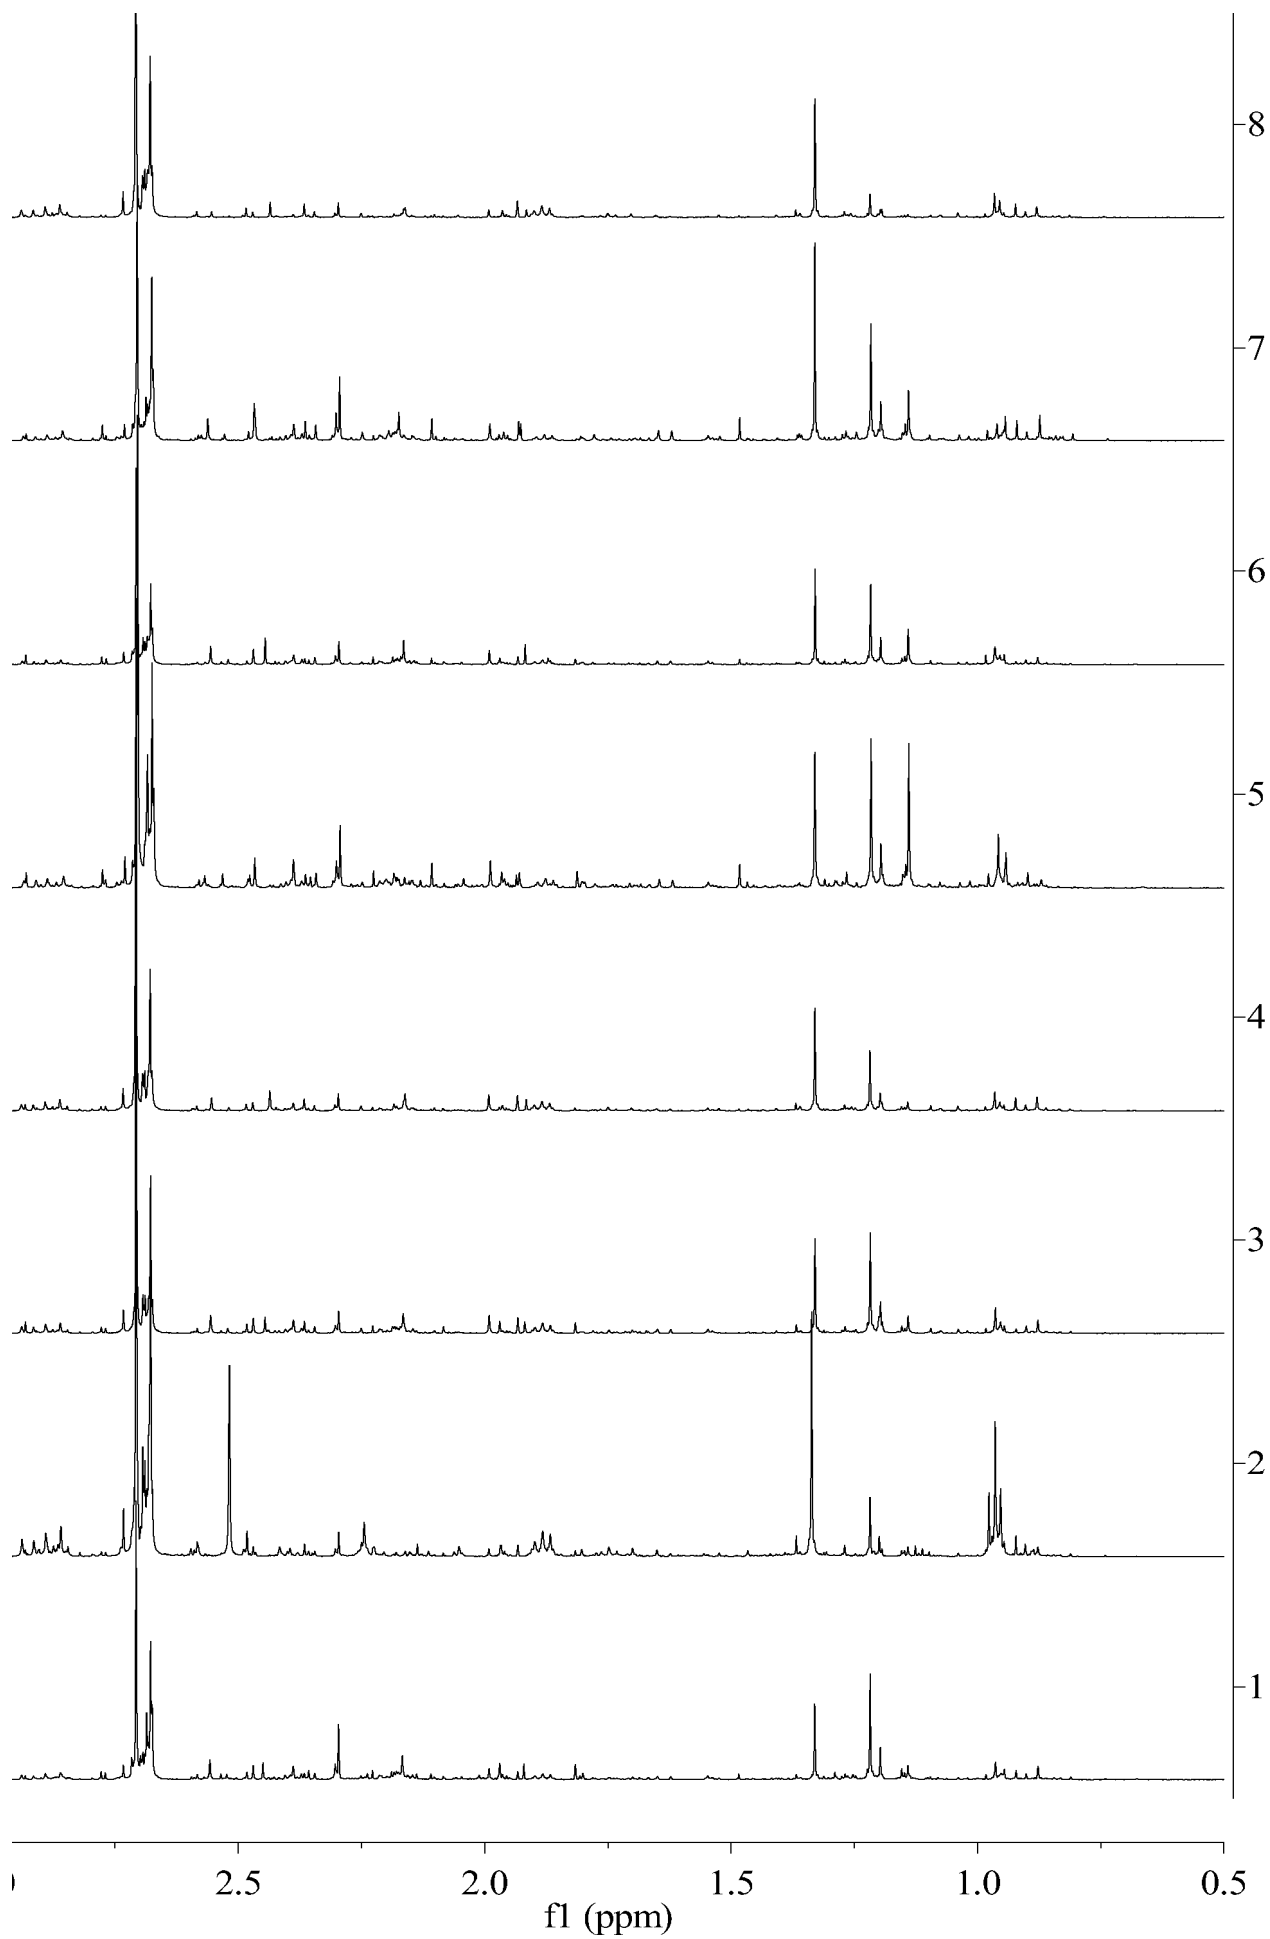

**Figure S11**

**Up-regulated genes**

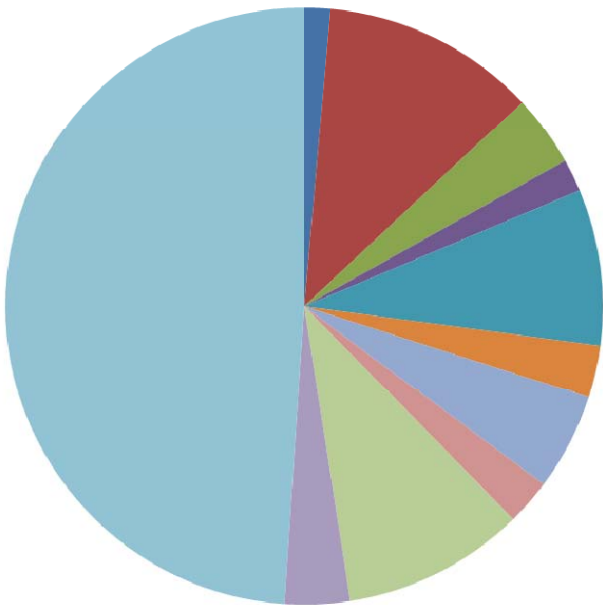

**Down-regulated genes**

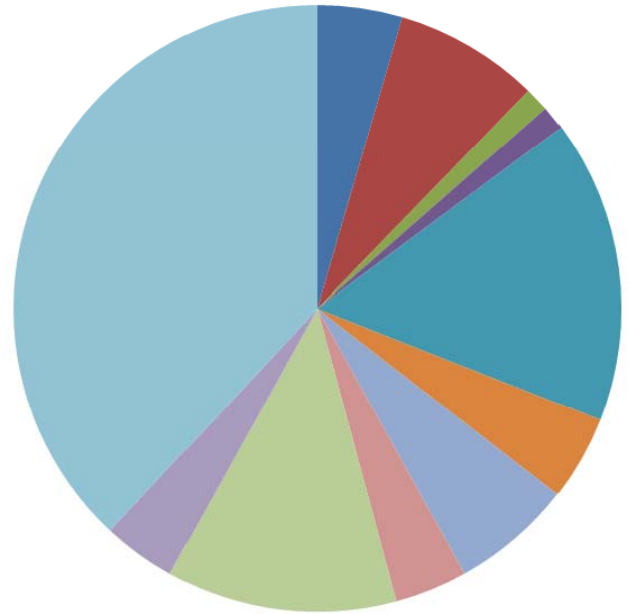

|                                                |             |
|------------------------------------------------|-------------|
| ■ Cell Growth, Cell Division and DNA Synthesis | (1.4/4.5)   |
| ■ Cell Rescue, Defense, Cell Death and Ageing  | (11.6/7.7)  |
| ■ Cell Wall                                    | (3.9/1.3)   |
| ■ Phytohormone Synthesis and Response          | (1.8/1.3)   |
| ■ Primary Metabolism                           | (8.5/16.1)  |
| ■ Protein Fate                                 | (2.8/4.5)   |
| ■ Secondary metabolism                         | (5.3/6.5)   |
| ■ Signal Transduction                          | (2.5/3.9)   |
| ■ Transcription factor                         | (9.9/12.3)  |
| ■ Transport                                    | (3.5/3.9)   |
| ■ Unknown                                      | (48.9/38.1) |

**Figure S12**

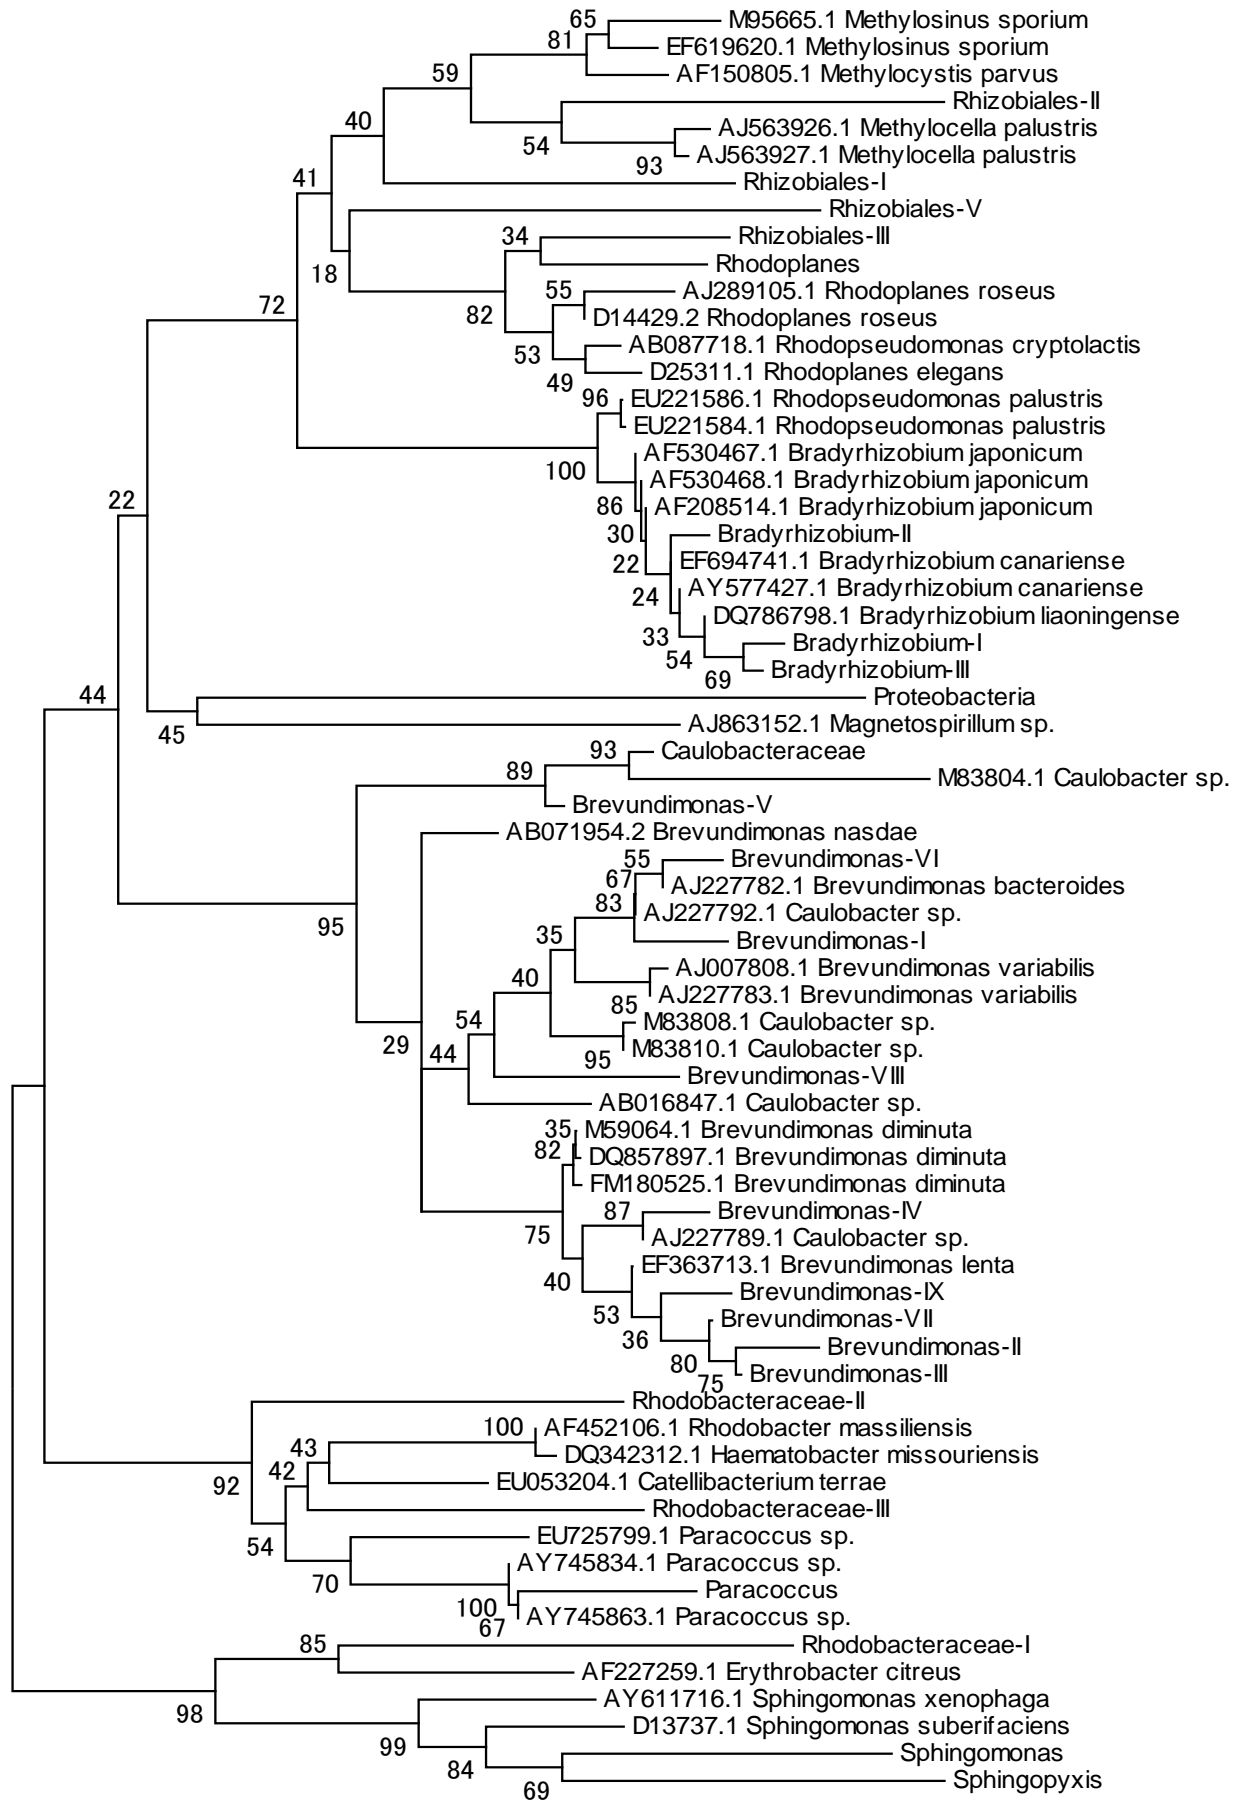

0.01

**Table S1.** Multi-response permutation procedures (MRPP) analysis comparing the microbial community associated with each Arabidopsis ABC transporter mutant. Each row (sample) was relativized by its total and each column (phylotype) was arcsine transformed. Generations were analyzed separately. The values in bold are statistically significant at  $P \leq 0.05$ ,  $n = 3$ .

|          | Relative<br>Sorenson<br>Distance <sup>1</sup> | MRPP Analysis <sup>2</sup> |              |              |
|----------|-----------------------------------------------|----------------------------|--------------|--------------|
|          |                                               | A-value                    | t-statistic  | p-value      |
| Fungi    |                                               |                            |              |              |
| Gen 0    | <b>0.707</b>                                  | <b>0.093</b>               | <b>-4.88</b> | <b>0.000</b> |
| Gen 1    | 0.585                                         | 0.025                      | -1.36        | 0.090        |
| Gen 2    | <b>0.619</b>                                  | <b>0.039</b>               | <b>-1.82</b> | <b>0.049</b> |
| Bacteria |                                               |                            |              |              |
| Gen 0    | <b>0.482</b>                                  | <b>0.142</b>               | <b>-7.44</b> | <b>0.000</b> |
| Gen 1    | 0.418                                         | 0.019                      | -1.16        | 0.124        |
| Gen 2    | <b>0.492</b>                                  | <b>0.036</b>               | <b>-2.33</b> | <b>0.015</b> |

<sup>1</sup>Sorenson distance is the average distance between all samples ( $n = 33$ ) within each generation. <sup>2</sup>MRPP analysis (relative Sorenson distance) was conducted for each generation to compare differences between Arabidopsis ABC transporter mutants.



**Table S2.** Pair wise comparisons (compared to wild type (Col-0) from MRPP analysis comparing the microbial community associated with each Arabidopsis ABC transporter mutant. Each row (samples) was relativized by its total and each column (phylotype) was arcsine transformed. Generations were analyzed separately. The values in bold are statistically significant at  $P \leq 0.05$ ,  $n = 3$ . *Ler*, Landsberg ecotype; T, negative control (soil without plant).

| Mutant        | Fungi        |       |              | Bacteria     |       |              |
|---------------|--------------|-------|--------------|--------------|-------|--------------|
|               | Gen 0        | Gen 1 | Gen 2        | Gen 0        | Gen 1 | Gen 2        |
| <i>Ler</i>    | 0.399        | 0.053 | 0.258        | 0.050        | 0.055 | 0.571        |
| T             | <b>0.050</b> | 0.088 | 0.748        | <b>0.040</b> | 0.211 | 0.353        |
| <i>tt4</i>    | <b>0.026</b> | 0.762 | 0.803        | 0.140        | 0.277 | 0.914        |
| <i>abca7</i>  | <b>0.022</b> | 0.640 | 0.072        | <b>0.024</b> | 0.741 | 0.871        |
| <i>abcg30</i> | <b>0.042</b> | 0.791 | <b>0.027</b> | 0.052        | 0.383 | <b>0.036</b> |
| <i>abcg34</i> | 0.297        | 0.811 | 0.552        | <b>0.039</b> | 0.775 | 0.798        |
| <i>abcg35</i> | 0.096        | 0.139 | 0.606        | 0.138        | 0.222 | 0.972        |
| <i>abcc2</i>  | <b>0.033</b> | 0.583 | 0.192        | 0.056        | 0.166 | 0.055        |
| <i>abcb1</i>  | 0.182        | 0.697 | 0.309        | 0.181        | 0.105 | 0.436        |
| <i>abcb4</i>  | 0.053        | 0.451 | 0.141        | <b>0.037</b> | 0.145 | 0.219        |

**Table S3.** Relative NMR intensity of changed metabolites in Col-0 and *abcg30* using projected *J*-resolved spectra (signals are normalized to 1000 of internal standard (TMSP) at  $\delta$  0.0\*).

| Metabolite                          | Target signal (ppm) | Intensity $\pm$ S.D. |                  | <i>P</i> value |
|-------------------------------------|---------------------|----------------------|------------------|----------------|
|                                     |                     | Col-0                | <i>abcg30</i>    |                |
| Benzoic acid                        | 7.89                | 0.28 $\pm$ 0.10      | 1.26 $\pm$ 0.13  | <0.001         |
| Salicylic acid                      | 7.84                | 0.37 $\pm$ 0.04      | 0.70 $\pm$ 0.09  | <0.001         |
| Syringic acid                       | 7.31                | 1.19 $\pm$ 0.06      | 1.88 $\pm$ 0.45  | 0.025          |
| Tartaric acid                       | 4.36                | 0.45 $\pm$ 0.02      | 1.98 $\pm$ 0.05  | <0.001         |
| Lactic acid                         | 1.32                | 8.29 $\pm$ 0.08      | 22.30 $\pm$ 0.56 | <0.001         |
| $\alpha$ -linolenic acid            | 0.97                | 4.11 $\pm$ 0.05      | 21.20 $\pm$ 0.83 | <0.001         |
| cyanidin                            | 8.08                | 0.47 $\pm$ 0.11      | 1.53 $\pm$ 0.24  | <0.001         |
| Sinapic acid and<br>Sinapoyl malate | 6.90                | 0.20 $\pm$ 0.01      | 1.15 $\pm$ 0.19  | <0.001         |
| Valine                              | 1.00                | 3.08 $\pm$ 0.04      | 9.22 $\pm$ 0.84  | <0.001         |
| Indole-3-acetic acid                | 7.58                | 0.81 $\pm$ 0.04      | 0.89 $\pm$ 0.03  | 0.026          |
| Raffinose                           | 5.40                | 2.42 $\pm$ 0.19      | 0.19 $\pm$ 0.04  | <0.001         |
| Glucose                             | 4.58                | 10.04 $\pm$ 0.08     | 6.89 $\pm$ 0.20  | <0.001         |
| Fructose                            | 4.02                | 46.31 $\pm$ 0.81     | 35.97 $\pm$ 1.45 | <0.001         |
| Mannitol                            | 3.85                | 61.64 $\pm$ 0.22     | 41.69 $\pm$ 1.00 | <0.001         |

\* All experiments are based on four replicates.

**Table S4.** Select list of genes differentially expressed in *abcg30* roots compared with wild type. The genes represented in this list are significantly up- and down-regulated at the value of  $P < 0.01$ .

| <b>Locus ID</b>             | <b>Description</b>                                                          | <b>Fold-change</b> |
|-----------------------------|-----------------------------------------------------------------------------|--------------------|
| <b>Up-regulated genes</b>   |                                                                             |                    |
| <i>Transport</i>            |                                                                             |                    |
| At4g22460                   | Protease inhibitor/seed storage/lipid transfer protein (LTP) family protein | 2.16               |
| At3g22120                   | Protease inhibitor/seed storage/lipid transfer protein (LTP) family protein | 2.14               |
| At2g34390                   | Major intrinsic family protein / MIP family protein                         | 2.03               |
| At3g24290                   | Ammonium transporter, putative                                              | 2.00               |
| At1g07290                   | Nucleotide-sugar transporter family protein                                 | 1.80               |
| At3g27170                   | Chloride channel protein (CLC-b)                                            | 1.76               |
| At1g12110                   | Nitrate/chlorate transporter (NRT1.1) (CHL1)                                | 1.74               |
| At5g44110                   | ABC transporter family protein (AtABCI21/AtNAP2)                            | 1.74               |
| At1g76520                   | Auxin efflux carrier family protein                                         | 1.61               |
| At2g26910                   | ABC transporter family protein ( AtABCG32/AtPDR4)                           | 1.53               |
| <i>Secondary metabolism</i> |                                                                             |                    |
| At1g47600                   | Glycosyl hydrolase family 1 protein                                         | 3.10               |
| At2g23910                   | Cinnamoyl-CoA reductase-related                                             | 2.65               |
| At3g45130                   | Cycloartenol synthase, putative                                             | 2.24               |
| At2g43840                   | UDP-glucuronosyl/UDP-glucosyl transferase family protein                    | 2.06               |
| At3g55120                   | Chalcone-flavanone isomerase / chalcone isomerase (CHI)                     | 2.02               |
| At5g08640                   | Flavonol synthase 1 (FLS1)                                                  | 1.88               |
| At3g21560                   | UDP-glucosyltransferase, putative                                           | 1.86               |

|           |                                                              |      |
|-----------|--------------------------------------------------------------|------|
| At5g05270 | Chalcone-flavanone isomerase family protein                  | 1.80 |
| At1g67980 | Caffeoyl-CoA 3-O-methyltransferase, putative                 | 1.79 |
| At2g43820 | UDP-glucuronosyl/UDP-glucosyl transferase family protein     | 1.75 |
| At1g78480 | Prenyltransferase/squalene oxidase repeat-containing protein | 1.67 |
| At5g13930 | Chalcone synthase / naringenin-chalcone synthase             | 1.65 |
| At5g04950 | Nicotianamine synthase, putative                             | 1.62 |

***Transcription factors***

|           |                                                             |      |
|-----------|-------------------------------------------------------------|------|
| At1g06160 | Ethylene-responsive factor, putative                        | 2.25 |
| At5g25810 | AP2 domain-containing transcription factor TINY (TINY)      | 2.05 |
| At5g53980 | Homeobox-leucine zipper family protein                      | 1.90 |
| At3g56980 | Basic helix-loop-helix (bHLH) family protein                | 1.83 |
| At5g42200 | Zinc finger (C3HC4-type RING finger) family protein         | 1.81 |
| At5g13910 | AP2/EREBP-like transcription factor LEAFY PETIOLE, putative | 1.80 |
| At5g17800 | Myb family transcription factor (MYB56)                     | 1.75 |
| At2g47520 | AP2 domain-containing transcription factor, putative        | 1.74 |
| At3g10910 | Zinc finger (C3HC4-type RING finger) family protein         | 1.71 |
| At1g02220 | No apical meristem (NAM) family protein                     | 1.69 |
| At5g53200 | Myb family transcription factor (TRIPTYCHON)                | 1.69 |
| At1g68880 | bZIP transcription factor family protein                    | 1.68 |
| At3g46640 | Myb family transcription factor                             | 1.68 |
| At2g47460 | Myb family transcription factor (MYB12)                     | 1.66 |
| At2g02740 | Transcription factor, putative                              | 1.65 |
| At1g50420 | Scarecrow-like transcription factor 3 (SCL3)                | 1.65 |
| At2g17040 | No apical meristem (NAM) family protein                     | 1.64 |

|           |                                                                                            |      |
|-----------|--------------------------------------------------------------------------------------------|------|
| At4g14465 | DNA-binding protein-related                                                                | 1.63 |
| At2g23340 | AP2 domain-containing transcription factor, putative                                       | 1.63 |
| At1g18400 | Basic helix-loop-helix (bHLH) family protein                                               | 1.61 |
| At5g01520 | Zinc finger (C3HC4-type RING finger) family protein                                        | 1.59 |
| At4g11360 | Zinc finger (C3HC4-type RING finger) family protein (RHA1b)                                | 1.59 |
| At1g09540 | Myb family transcription factor (MYB61)                                                    | 1.59 |
| At1g13600 | bZIP transcription factor family protein                                                   | 1.57 |
| At1g48000 | Myb family transcription factor                                                            | 1.57 |
| At5g50820 | No apical meristem (NAM) family protein                                                    | 1.56 |
| At5g42140 | Zinc finger protein, putative / regulator of chromosome condensation (RCC1) family protein | 1.53 |
| At1g15100 | Zinc finger (C3HC4-type RING finger) family protein                                        | 1.50 |

### **Down-regulated genes**

#### ***Transport***

|           |                                                 |      |
|-----------|-------------------------------------------------|------|
| At5g65990 | Amino acid transporter family protein           | 0.48 |
| At4g36670 | Mannitol transporter, putative                  | 0.46 |
| At5g02170 | Amino acid transporter family protein           | 0.40 |
| At3g60160 | ABC transporter family protein (AtABCC9/AtMRP9) | 0.38 |
| At1g08920 | Sugar transporter, putative                     | 0.35 |
| At4g04760 | Sugar transporter family protein                | 0.34 |

#### ***Secondary metabolism***

|           |                                       |      |
|-----------|---------------------------------------|------|
| At1g64910 | Glycosyltransferase family protein    | 0.50 |
| At3g51450 | Strictosidine synthase family protein | 0.49 |

|           |                                                                          |      |
|-----------|--------------------------------------------------------------------------|------|
| At1g49530 | Geranylgeranyl pyrophosphate synthase (GGPS6) / farnesyltranstransferase | 0.47 |
| At4g20230 | Terpene synthase/cyclase family protein                                  | 0.47 |
| At3g31415 | Terpene synthase/cyclase family protein                                  | 0.47 |
| At4g15340 | Pentacyclic triterpene synthase (04C11)                                  | 0.45 |
| At3g22250 | UDP-glucuronosyl/UDP-glucosyl transferase family protein                 | 0.41 |
| At4g15280 | UDP-glucuronosyl/UDP-glucosyl transferase family protein                 | 0.41 |
| At5g42600 | Pentacyclic triterpene synthase, putative                                | 0.30 |

***Transcription factors***

|           |                                                                                          |      |
|-----------|------------------------------------------------------------------------------------------|------|
| At2g22750 | Basic helix-loop-helix (bHLH) family protein                                             | 0.49 |
| At1g71200 | Basic helix-loop-helix (bHLH) family protein                                             | 0.49 |
| At1g74930 | AP2 domain-containing transcription factor, putative                                     | 0.48 |
| At4g22950 | MADS-box protein (AGL19)                                                                 | 0.45 |
| At1g65920 | Regulator of chromosome condensation (RCC1) family protein / zinc finger protein-related | 0.43 |
| At1g69490 | No apical meristem (NAM) family protein                                                  | 0.43 |
| At3g57920 | Squamosa promoter-binding protein, putative                                              | 0.42 |
| At1g19210 | AP2 domain-containing transcription factor, putative                                     | 0.38 |
| At2g44840 | Ethylene-responsive element-binding protein, putative                                    | 0.35 |
| At4g34410 | AP2 domain-containing transcription factor, putative                                     | 0.34 |
| At3g53600 | Zinc finger (C2H2 type) family protein                                                   | 0.31 |
| At1g35625 | Protease-associated zinc finger (C3HC4-type RING finger) family protein                  | 0.27 |
| At2g46510 | Basic helix-loop-helix (bHLH) family protein                                             | 0.19 |

---

**Table S5.** *In vitro* analysis of the Arabidopsis wild type (Col-0), *abcg30* root exudates and MS liquid media (control) effect on Arabidopsis soil microbes by plate counting assay. Values represented are the mean values of three independent experimental results. The readings were taken at two time points 24 and 48 hrs after plating. The values represent in parentheses are counts observed at 48 hr.

| <b>Soil dilutions</b> | <b>Col-0 root exudates</b> | <b><i>abcg30</i> root exudates</b> | <b>MS media</b> |
|-----------------------|----------------------------|------------------------------------|-----------------|
| 10 <sup>-2</sup>      | BL (BL)                    | BL (BL)                            | 42±7(68±8)      |
| 10 <sup>-3</sup>      | BL (BL)                    | BL (BL)                            | 3±1 (12±3)      |
| 10 <sup>-4</sup>      | BL (BL)                    | BL (BL)                            | 0±0 (0±)        |
| 10 <sup>-5</sup>      | 280±15 (BL)                | 0±0 (71±14)                        | 0±0 (0±)        |

BL, bacterial lawn

**Table S6.** List of ABC transporters and their T-DNA KO mutants used in this study.

| Locus ID  | New synthetic name | Synonym       | Mutant name     | Reference               |
|-----------|--------------------|---------------|-----------------|-------------------------|
| At4g15230 | <i>abcg30</i>      | <i>AtPDR2</i> | garlic_811_F08* | Badri et al., (2008)    |
| At2g36380 | <i>abcg34</i>      | <i>AtPDR6</i> | garlic_627_F11* | Badri et al., (2008)    |
| At1g15210 | <i>abcg35</i>      | <i>AtPDR7</i> | Salk_134725     | Badri et al., (2008)    |
| At2g34660 | <i>abcc2</i>       | <i>AtMRP2</i> | Salk_128332     | Badri et al., (2008)    |
| At3g47780 | <i>abca7</i>       | <i>AtATH6</i> | Salk_104795     | Badri et al., (2008)    |
| At2g36910 | <i>abcb1</i>       | <i>AtPgp1</i> | Salk_046440     | Badri et al., (2008)    |
| At2g47000 | <i>abcb4</i>       | <i>AtPgp4</i> | Salk_010207     | Santelia et al., (2005) |

\*Currently named as SAIL lines; All T-DNA KO lines are in Arabidopsis wild type (Col-0) background.
